# Supplementary material for: Electrochemical N2 fixation to NH3 under ambient conditions: porous LiFe5O8 nanoparticle–reduced graphene oxide as a highly efficient and selective catalyst
Source: Royal Society of Chemistry journal article supplement (doi:10.1039/d1qi00419k), 2021-01-01
Supplement: d1qi00419k1.pdf [file d1qi00419k1.pdf]

# **Electrochemical N<sub>2</sub> fixation to NH<sub>3</sub> under ambient conditions: porous LiFe<sub>5</sub>O<sub>8</sub> nanoparticle-reduced graphene oxide as a highly efficient and selective catalyst**

Yuyao Ji,<sup>a</sup> Lei Li,<sup>b</sup> Wendong Cheng,<sup>a</sup> Yu Xiao,<sup>a</sup> Chengbo Li<sup>b</sup> and Xingquan Liu<sup>a\*</sup>

<sup>a</sup>R&D Center for New Energy Materials and Integrated Energy Devices, School of Materials and Energy, University of Electronic Science and Technology of China, Chengdu 610054, China.

<sup>b</sup>College of Chemistry and Materials Science, Sichuan Normal University, Chengdu 610068, China.

## **Content:**

|                                         |     |
|-----------------------------------------|-----|
| Supplementary Experimental Section..... | S2  |
| Supplementary Figures.....              | S5  |
| Supplementary Tables.....               | S15 |
| References.....                         | S16 |

## Experimental section

**Materials:** GO, Lithium carbonate ( $\text{Li}_2\text{CO}_3$ ), iron oxide ( $\text{Fe}_2\text{O}_3$ ), sodium sulfate ( $\text{Na}_2\text{SO}_4$ ), lithium sulfate ( $\text{Li}_2\text{SO}_4$ ), methyl mercaptoacetate, ammonium chloride ( $\text{NH}_4\text{Cl}$ ), hydrazine hydrate ( $\text{N}_2\text{H}_4\cdot\text{H}_2\text{O}$ ), salicylic acid ( $\text{C}_7\text{H}_6\text{O}_3$ ), sodium citrate ( $\text{C}_6\text{H}_5\text{Na}_3\text{O}_7$ ), sodium hypochlorite ( $\text{NaClO}$ ), sodium hydroxide ( $\text{NaOH}$ ), hydrochloric acid ( $\text{HCl}$ ), ethanol ( $\text{CH}_3\text{CH}_2\text{OH}$ ), sodium monophosphate ( $\text{NaH}_2\text{PO}_2$ ) and carbon paper (CP) were bought from Beijing Chemical Corporation. Para-(dimethylamino) benzaldehyde ( $\text{C}_9\text{H}_{11}\text{NO}$ ), sodium nitroferricyanide (III) dihydrate ( $\text{Na}_2\text{Fe}(\text{CN})_5\text{NO}\cdot 2\text{H}_2\text{O}$ ), and Nafion were purchased from Aladdin Ltd. (Shanghai, China). The water used throughout all experiments was purified through a Millipore system. The water used throughout all experiments was purified through a Millipore system. All chemicals were used as received without further purification.

**Preparation of  $\text{LiFe}_5\text{O}_8$ -rGO:** The preparation process of the porous  $\text{LiFe}_5\text{O}_8$ -rGO composite is as follows: 0.1 g of  $\text{LiFe}_5\text{O}_8$  particles and a certain amount of freeze-dried GO were dissolved in DMF using ultrasonication for 60 min and subsequently heated at 80 °C using a water bath. Then, 12.5 mL of hydrazine and 5 mL of methyl mercaptoacetate were added dropwise, while  $\text{N}_2$  protection continued. The chemical reactions were stopped by cold ethanol after etching for 45 min. The obtained black powder was separated through centrifugation and washed with deionized water and ethanol.

**Preparation of  $\text{LiFe}_5\text{O}_8$ -rGO electrode:** 10 mg  $\text{LiFe}_5\text{O}_8$ -rGO powders and 40  $\mu\text{L}$  of Nafion solution (5 wt%) were dispersed in 960  $\mu\text{L}$  mixed solution containing 720  $\mu\text{L}$  ethanol and 240  $\mu\text{L}$   $\text{H}_2\text{O}$  by 2 h sonication to form a homogeneous ink. Then, 10  $\mu\text{L}$   $\text{LiFe}_5\text{O}_8$ -rGO was loaded on a CP with area of 1 x 1  $\text{cm}^2$  and dried under ambient condition.

**Characterizations:** XRD patterns were obtained from a Shimadzu XRD-6100 diffractometer with  $\text{Cu K}\alpha$  radiation (40 kV, 30 mA) of wavelength 0.154 nm (Japan). SEM images were collected from the tungsten lamp-equipped SU3500 scanning electron microscope at an

accelerating voltage of 20 kV (HITACHI, Japan). TEM images were obtained from a Zeiss Libra 200FE transmission electron microscope operated at 200 kV. XPS measurements were performed on an ESCALABMK II X-ray photoelectron spectrometer using Mg as the exciting source. The UV-Vis absorbance spectra were measured on a SHIMADZU UV-1800 UV-Vis spectrophotometer. energy dispersive X-ray analysis (EDX), and the Brunner–Emmet–Teller method (BET, ASAP 2020, Micromeritics).

**Electrochemical measurements:** Before NRR measures, the Nafion proton exchange film was pretreated by heating in 3% H<sub>2</sub>O<sub>2</sub> solution, 0.5 M H<sub>2</sub>SO<sub>4</sub> and ultrapure water at 80 °C for 1.5 h, respectively. Electrochemical measurements were carried out on a CHI 660E electrochemical analyzer (CHI Instruments, Inc., Shanghai) in a three-electrode system using Ti<sub>3</sub>C<sub>2</sub>T<sub>x</sub>/CP or CP as working electrode, Ag/AgCl as reference electrode, and graphite rod as counter electrode. All experiments were performed at ambient conditions. For N<sub>2</sub> reduction reaction experiments, the HCl electrolyte (0.1 M) was bubbled with high-purity N<sub>2</sub> (99.999%) for 30 min before measurement. All potentials reported in this work were calibrated to RHE, using the following equation:

$$E \text{ (RHE)} = E \text{ (Ag/AgCl)} + (0.197 + 0.059 \text{ pH}) \text{ V}$$

**Determination of NH<sub>3</sub>:** NH<sub>3</sub> concentration was determined by the indophenol blue method.<sup>1</sup> The method contains the following details: 2 mL HCl post-NRR electrolyte was collected from the cathodic chamber. Then, 2 mL of 1 M NaOH solution containing 5% salicylic acid and 5% sodium citrate was added into this solution. After mixing and standing at room temperature for 2 h, the UV-Vis absorption spectrum was measured at a wavelength of 655 nm. The concentration-absorbance curves were calibrated using standard NH<sub>4</sub>Cl solution (0.1 HCl solution as mother solution) with a series of concentrations. The fitting curve ( $y = 0.475x + 0.066$ ,  $R^2 = 0.999$ ) shows good linear relation of absorbance value with NH<sub>3</sub> concentration by three times independent calibrations.

**Determination of N<sub>2</sub>H<sub>4</sub>:** Concentration of N<sub>2</sub>H<sub>4</sub> in the electrolyte was estimated by the method of Watt and Chrisp.<sup>2</sup> Typically, a mixture solution containing p-C<sub>9</sub>H<sub>11</sub>NO (5.99 g), concentrated HCl (30 mL) and ethanol (300 mL) was used as a color reagent. In detail, 2 mL

electrolyte removed from the cathodic chamber was added into 2 mL above prepared color reagent. After standing the mixture solution at room temperature for 20 min, UV-Vis absorption spectra were measured at a wavelength of 455 nm. The concentration-absorbance curves were calibrated using standard  $\text{N}_2\text{H}_4$  solutions with a series of concentrations for three independent calibrations.

**Calculations of  $\text{NH}_3$  yield and FE:**  $\text{NH}_3$  yield was calculated using the following equations:

$$R_{\text{NH}_3} (\mu\text{g h}^{-1} \text{mg}_{\text{cat.}}^{-1}) = (c_{\text{NH}_3} \times V) / (17 \times t \times m)$$

Where  $c_{\text{NH}_3}$  ( $\mu\text{g mL}^{-1}$ ) is the measured  $\text{NH}_3$  concentration;  $V$  (mL) is the volume of electrolyte (in our work 35 mL);  $t$  (s or h) is the reaction time;  $A$  ( $\text{cm}^2$ ) is the geometric area of the cathode;  $m$  (mg) is the mass loading of catalyst on CP.

FE was calculated according to following equation:

$$\text{FE} = 3 \times F \times c_{\text{NH}_3} \times V / (17 \times Q) \times 100\%$$

Where  $F$  is Faraday constant ( $96500 \text{ C mol}^{-1}$ );  $Q$  (C) is the quantity of applied electricity.

**Computational details:** To gain more in-depth insights into the mechanism for nitrogen reduction reaction (NRR) on  $\text{Ti}_3\text{C}_2\text{T}_x$  ( $X = \text{F}, \text{OH}$ ) nanosheet, density functional theory (DFT) calculations are carried out using the Vienna ab initio simulation package (VASP). Exchange-correlation energy is described by Perdew-Burke-Ernzerhof (PBE) version of the generalized gradient approximation (GGA). The projector-augmented wave (PAW) method is used to represent the core-valence electron interaction. The calculations also adopt long-range dispersion interactions (DFT-D3 (BJ)) A Hubbard  $U$  term is introduced to the PBE functional, with  $U_{\text{eff}} = 4.2 \text{ eV}$  for Ti on its d orbital. An energy cutoff of 480 eV for basis-set expansion is used. A  $2 \times 2$  supercell and the corresponding  $5 \times 5 \times 1$  k-point mesh are modeled in the calculations. A vacuum region of about 20 Å is set to decouple the periodic replicas. Two F and OH groups attached to the hollow sites between the three neighboring carbon atoms are added on each side of  $\text{Ti}_3\text{C}_2\text{T}_x$  monolayer according to previous literatures. A OH group is removed to expose active sites for  $\text{N}_2$  adsorption. The force tolerance and total energy for the relaxations are converged to  $0.02 \text{ eV \AA}^{-1}$  and  $10^{-5} \text{ eV}$ , respectively. The Gibbs free energy is calculated via the computational hydrogen electrode model proposed by Nørskov et al.<sup>3</sup>

$$\Delta G = \Delta E + \Delta \text{ZPE} - T\Delta S$$

T and pH value are set to be 298.15K and 0 in this work, respectively. For adsorbates, ZPE and S are determined by vibrational frequencies calculations. For molecules, those are taken from the NIST database.

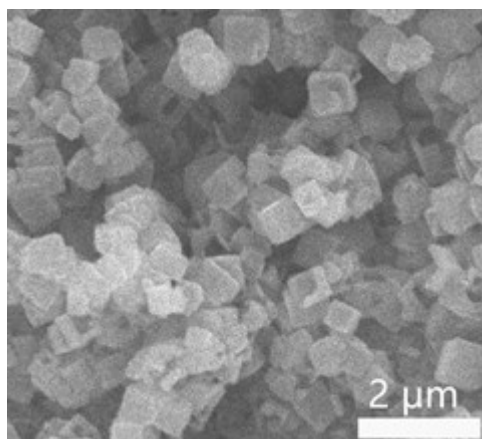

**Fig. S1.** SEM image of  $\text{LiFe}_5\text{O}_8$ .

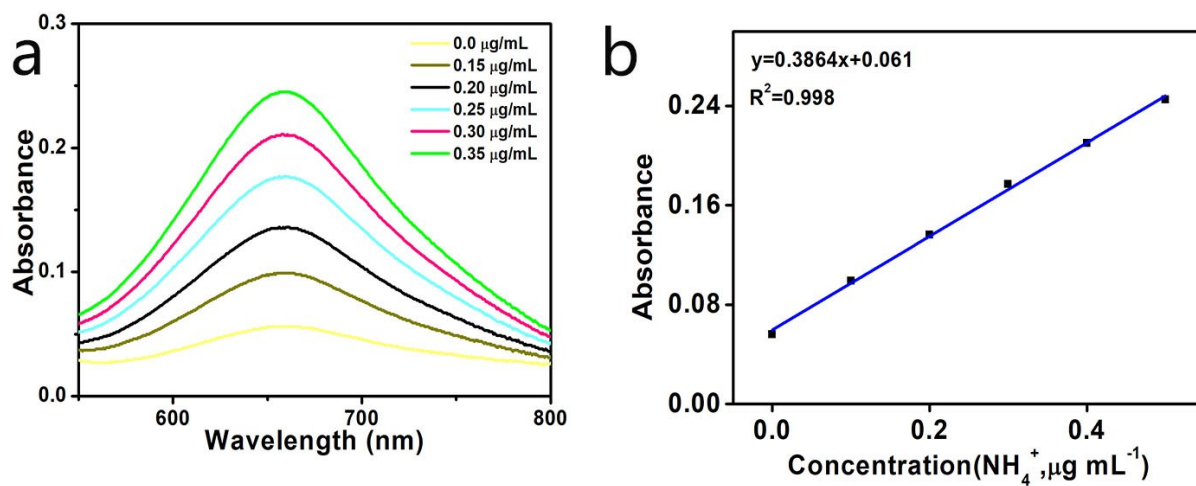

**Fig. S2.** (a) UV-Vis absorption spectra of indophenol assays with  $\text{NH}_4^+$  concentrations after incubated for 2 h at room temperature. (b) Calibration curve used for calculation of  $\text{NH}_4^+$  concentrations.

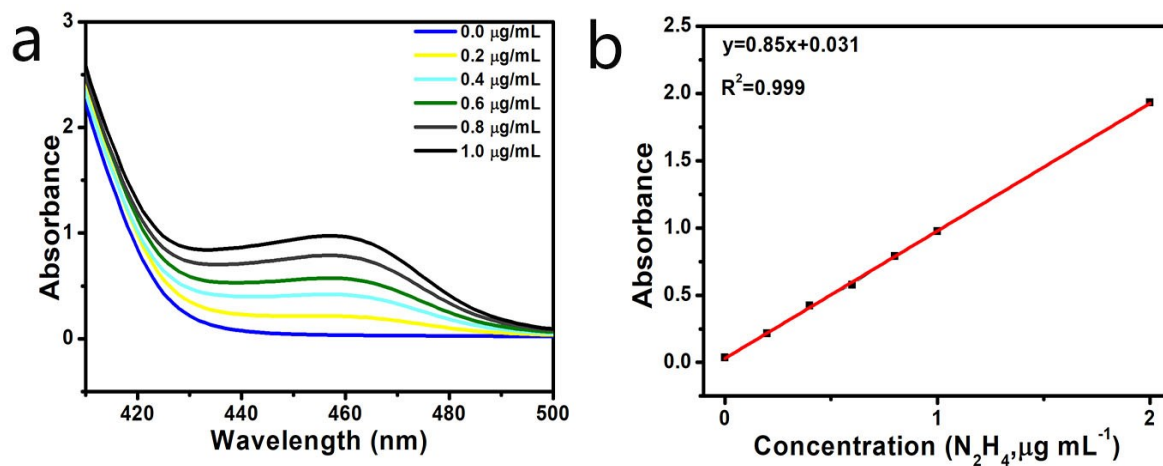

**Fig. S3.** (a) UV-Vis absorption spectra of various  $N_2H_4$  concentrations after incubated for 10 min at room temperature. (b) Calibration curve used for calculation of  $N_2H_4$  concentrations.



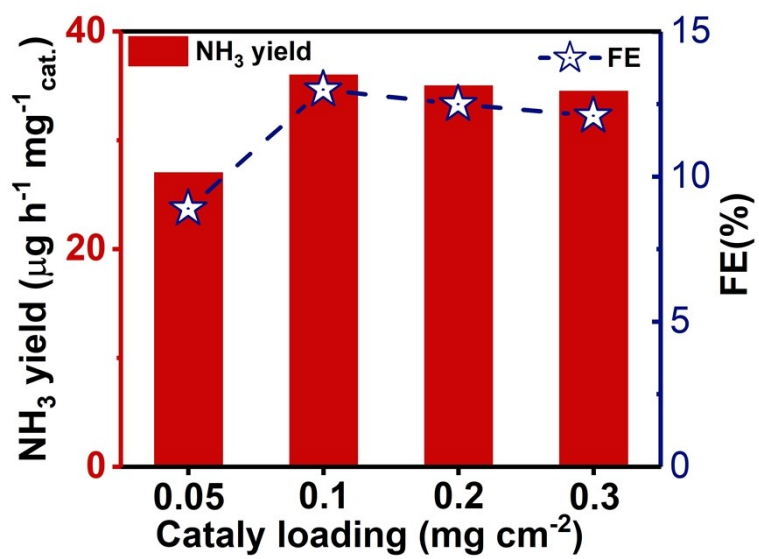

**Fig. S4.** The NH<sub>3</sub> yields and FEs for LiFe<sub>5</sub>O<sub>8</sub>/rGO with different catalyst loadings.

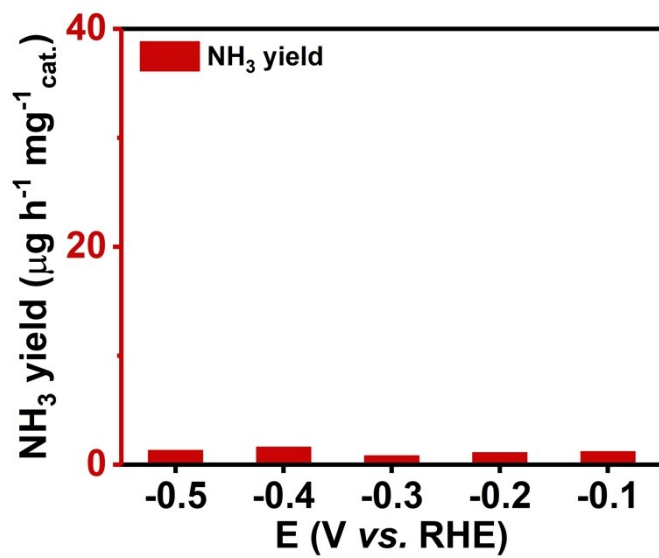

**Fig. S5.** The amount of NH<sub>3</sub> detected in the Ar-saturated electrolyte at each potential.

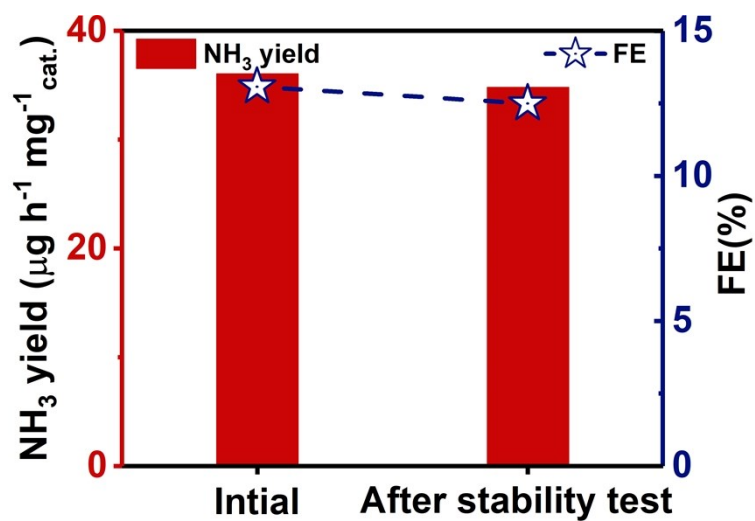

**Fig. S6.** NH<sub>3</sub> yields and FEs for LiFe<sub>5</sub>O<sub>8</sub>-rGO/CP after stability test.

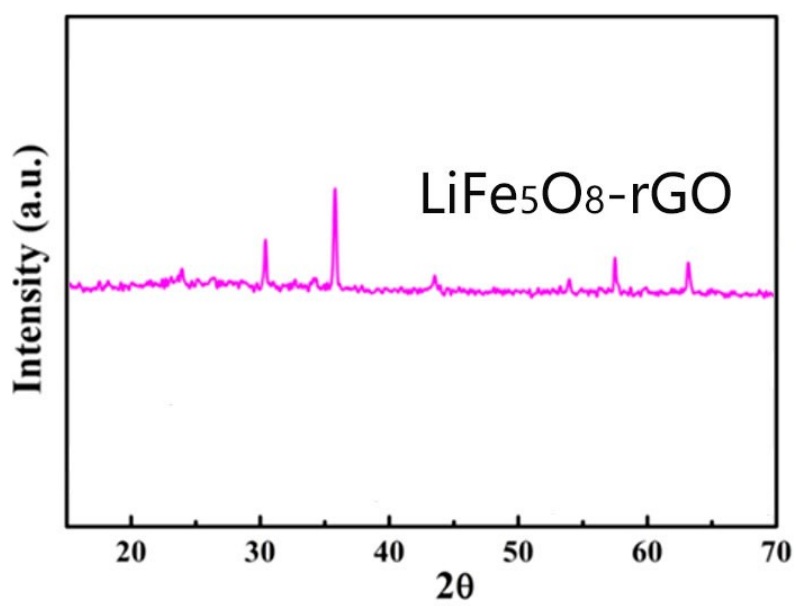

**Fig. S7.** XRD pattern of LiFe<sub>5</sub>O<sub>8</sub>-rGO after stability test.

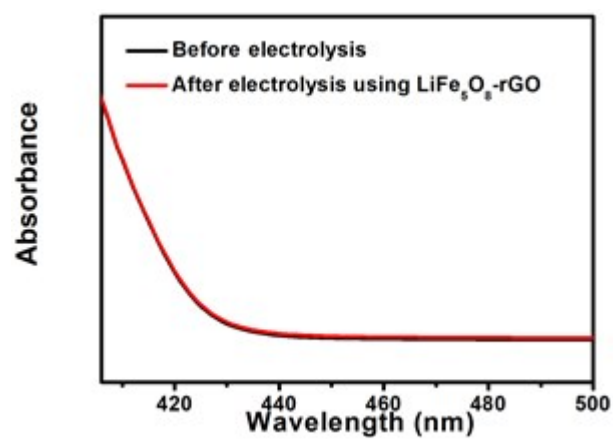

**Fig. S8.** UV-Vis absorption spectra of the electrolytes estimated by the method of Watt and Chrisp before and after 2 h electrolysis in N<sub>2</sub> atmosphere at -0.2 V.

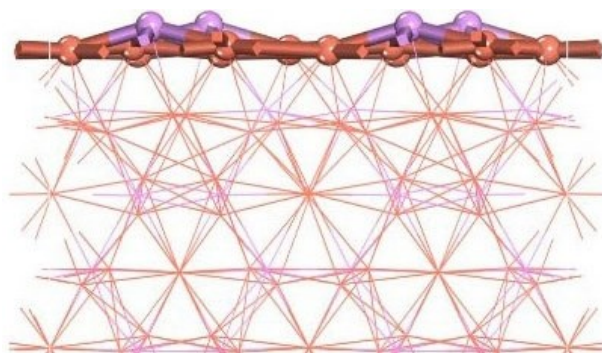

**Fig. S9.** Side views of the LiFe<sub>5</sub>O<sub>8</sub> (111) surface.

**Table S1.** Comparison of electrocatalytic N<sub>2</sub> reduction performance for LiFe<sub>5</sub>O<sub>8</sub>-rGO with other aqueous-based electrocatalysts under ambient conditions.

| Catalyst                                                         | Electrolyte                           | NH <sub>3</sub> yield rate<br>( $\mu\text{g h}^{-1} \text{mg}_{\text{cat.}}^{-1}$ ) | FE (%)       | Ref.             |
|------------------------------------------------------------------|---------------------------------------|-------------------------------------------------------------------------------------|--------------|------------------|
| <b>LiFe<sub>5</sub>O<sub>8</sub>-rGO</b>                         | <b>0.1 M HCl</b>                      | <b>36.025</b>                                                                       | <b>13.08</b> | <b>This work</b> |
| $\alpha$ -Au/CeO <sub>x</sub> -RGO                               | -                                     | 8.3                                                                                 | 10.1         | 4                |
| TA-reduced Au/TiO <sub>2</sub>                                   | -                                     | 21.4                                                                                | 8.11         | 5                |
| MoN NA/CC                                                        | -                                     | 18.42                                                                               | 1.15         | 6                |
| MoO <sub>3</sub>                                                 | -                                     | 29.43                                                                               | 1.9          | 7                |
| VN/TM                                                            | -                                     | 5.14                                                                                | 2.25         | 8                |
| Bi <sub>4</sub> V <sub>2</sub> O <sub>11</sub> /CeO <sub>2</sub> | -                                     | 23.21                                                                               | 1.16         | 9                |
| Mo <sub>2</sub> N                                                | -                                     | 78.4                                                                                | 4.5          | 10               |
| NPC                                                              | 0.05 M H <sub>2</sub> SO <sub>4</sub> | 23.8                                                                                | 1.42         | 11               |
| CuO/RGO                                                          | 0.1 M Na <sub>2</sub> SO <sub>4</sub> | 11.02                                                                               | 3.9          | 12               |
| TiO <sub>2</sub> -rGO                                            | 0.1 M Na <sub>2</sub> SO <sub>4</sub> | 15.13                                                                               | 3.3          | 13               |
| $\gamma$ -Fe <sub>2</sub> O <sub>3</sub>                         | 0.1 M KOH                             | 0.212                                                                               | 1.9          | 14               |
| Fe <sub>2</sub> O <sub>3</sub> nanorods                          | 0.1 M Na <sub>2</sub> SO <sub>4</sub> | 15.9                                                                                | 0.94         | 15               |

## References

- 1 D. Zhu, L. Zhang, R. E. Ruther and R. J. Hamers, Photo-illuminated diamond as a solid-state source of solvated electrons in water for nitrogen reduction. *Nat. Mater.*, 2013, **12**, 836–841.
- 2 G. W. Watt and J. D. Chrisp, Spectrophotometric method for determination of hydrazine. *Anal. Chem.*, 1952, **24**, 2006–2008.
- 3 G. Kresse and J. Furthmüller, Efficient iterative schemes for Ab initio total-energy calculations using a plane-wave basis set. *Phys. Rev. B.*, 1996, **54**, 11169.
- 4 S. Li, D. Bao, M. Shi, B. Wulan, J. Yan and Q. Jiang, Amorphizing of Au nanoparticles by CeO<sub>x</sub>-RGO hybrid support towards highly efficient electrocatalyst for N<sub>2</sub> reduction under ambient conditions *Adv. Mater.*, 2017, **29**, 1700001.
- 5 M. Shi, D. Bao, B. Wulan, Y. Li, Y. Zhang, J. Yan and Q. Jiang, Au sub-nanoclusters on TiO<sub>2</sub> toward highly efficient and selective electrocatalyst for N<sub>2</sub> conversion to NH<sub>3</sub> at ambient conditions. *Adv. Mater.*, 2017, **29**, 1606550.
- 6 L. Zhang, X. Ji, X. Ren, Y. Luo, X. Shi, A. M. Asiri, B. Zheng and X. Sun, A novel strategy to synthesize Au nanoplates and their application for enzymeless H<sub>2</sub>O<sub>2</sub> detection. *ACS Sustainable Chem. Eng.*, 2018, **6**, 9550–9554.
- 7 J. Han, X. Ji, X. Ren, G. Cui, L. Li, F. Xie, H. Wang, B. Li and X. Sun, MoO<sub>3</sub> nanosheets for efficient electrocatalytic N<sub>2</sub> fixation to NH<sub>3</sub>. *J. Mater. Chem. A*, 2018, **6**, 12974–12977.
- 8 R. Zhang, Y. Zhang, X. Ren, G. Cui, A. M. Asiri, B. Zheng and X. Sun, High-efficiency electrosynthesis of ammonia with high selectivity under ambient conditions enabled by VN nanosheet array. *ACS Sustainable Chem. Eng.*, 2018, **6**, 9545–9549.
- 9 C. Lv, C. Yan, G. Chen, Y. Ding, J. Sun, Y. Zhou and G. Yu, An Amorphous Noble - Metal-free electrocatalyst that enables nitrogen fixation under ambient conditions *Angew. Chem., Int. Ed.*, 2018, **57**, 6073–6076.
- 10 X. Ren, G. Cui, L. Chen, F. Xie, Q. Wei, Z. Tian and X. Sun, Electrochemical N<sub>2</sub> fixation to NH<sub>3</sub> under ambient conditions: Mo<sub>2</sub>N nanorod as a highly efficient and selective catalyst. *Chem. Commun.*, 2018, **54**, 8474–8477.



- 11 Y. Liu, Y. Su, X. Quan, X. Fan, S. Chen, H. Yu, H. Zhao, Y. Zhang and J. Zhao, Facile ammonia synthesis from electrocatalytic N<sub>2</sub> reduction under ambient conditions on N-doped porous carbon. *ACS Catal.*, 2018, **8**, 1186–1191.
- 12 F. Wang, Y. Liu, H. Zhang and K. Chu, CuO/Graphene nanocomposite for nitrogen reduction reaction. *ChemCatChem*, 2019, **11**, 1441–1447.
- 13 X. Zhang, Q. Liu, X. Shi, A. M. Asiri, Y. Luo, X. Sun and T. Li, Zhang, TiO<sub>2</sub> nanoparticles-reduced graphene oxide hybrid: an efficient and durable electrocatalyst toward artificial N<sub>2</sub> fixation to NH<sub>3</sub> under ambient conditions. *J. Mater. Chem. A*, 2018, **6**, 17303–17306.
- 14 J. Kong, A. Lim, C. Yoon, J. Jang, H. Ham, J. Han, S. Nam, D. Kim, Y.-E. Sung, J. Choi and H. S. Park, Electrochemical synthesis of NH<sub>3</sub> at low temperature and atmospheric pressure using a Fe<sub>2</sub>O<sub>3</sub> catalyst. *ACS Sustainable Chem. Eng.*, 2017, **5**, 10986–10995.
- 15 X. Xiang, Z. Wang, X. Shi, M. Fan and Sun, X. Ammonia synthesis from electrocatalytic N<sub>2</sub> reduction under ambient conditions by Fe<sub>2</sub>O<sub>3</sub> nanorods. *ChemCatChem*, 2018, **10**, 4530–4535.
